# Supplementary material
Source: publisher figshare collection journal article supplement (https://acs.figshare.com/ndownloader/files/14075738)
Supplement: Supplementary file 1 [file 14075738]

# Intensifying the antimicrobial activity of poly[2-(*tert*-butylamino)ethyl methacrylate]/polylactide composites by tailoring their chemical and physical structures

*Chih-Kuang Chen<sup>\*,a</sup> Mong-Chuan Lee,<sup>b</sup> Zheng-Ian Lin,<sup>a</sup> Chun-An Lee,<sup>c</sup> Yu-Chieh Tung,<sup>c</sup> Ching-Wen Lou,<sup>d,e,f,g</sup> Wing-Cheung Law,<sup>h</sup> Nai-Tzu Chen,<sup>i</sup> Kun-Yi Andrew Lin<sup>\*,j</sup> Jia-Horng Lin<sup>\*,c,d,e,f,k,l</sup>*

<sup>a</sup>Department of Chemical Engineering and Materials Engineering, National Yunlin University of Science and Technology, Yunlin 64002, Taiwan, <sup>b</sup>Graduate Institute of Biotechnology and Biomedical Engineering, Central Taiwan University of Science and Technology, Taichung 40601, Taiwan, <sup>c</sup>Department of Fiber and Composite Materials, Feng Chia University, Taichung 40724, Taiwan, <sup>d</sup>College of Textile and Clothing, Qingdao University, Shangdong 266071, China, <sup>e</sup>Department of Chemical Engineering and Materials, Ocean College, Minjiang University, Fuzhou 350108, China, <sup>f</sup>Innovation Platform of Intelligent and Energy-Saving Textiles, School of Textiles, Tianjin Polytechnic University, Tianjin 300387, China, <sup>g</sup>Department of Bioinformatics and Medical Engineering, Asia University, Taichung 41354, Taiwan, <sup>h</sup>Department of Industrial and Systems Engineering, The Hong Kong Polytechnic University, Hung Hom, Kowloon, Hong Kong SAR, China, <sup>i</sup>Institute of New Drug Development, China Medical University, Taichung 40402, Taiwan, <sup>j</sup>Department of Environmental Engineering, National Chung Hsing University, Taichung

40227, Taiwan, <sup>k</sup>School of Chinese Medicine, China Medical University, Taichung 40402, Taiwan,  
<sup>l</sup>Department of Fashion Design, Asia University, Taichung 41354, Taiwan.

## Supporting Figures

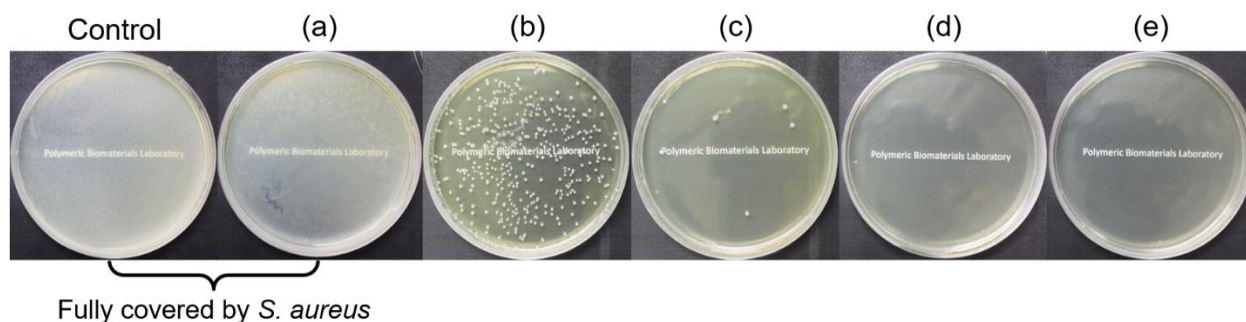

**Figure S1.** Agar plates after 18 h incubation of the untreated *S. aureus* bacterial suspension (Control) and the PTA-20-treated *S. aureus* bacterial suspensions with a PTA-20 concentration of a) 0.05 mg/mL, b) 0.1 mg/mL, c) 0.25 mg/mL, d) 0.5 mg/mL and e) 1 mg/mL.

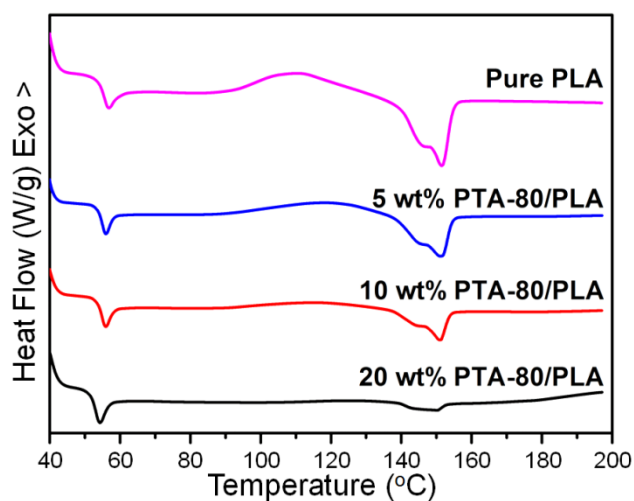

**Figure S2.** DSC thermograms of pure PLA and amorphous PTA-80/PLA composite thin films with an increasing PTA added content.

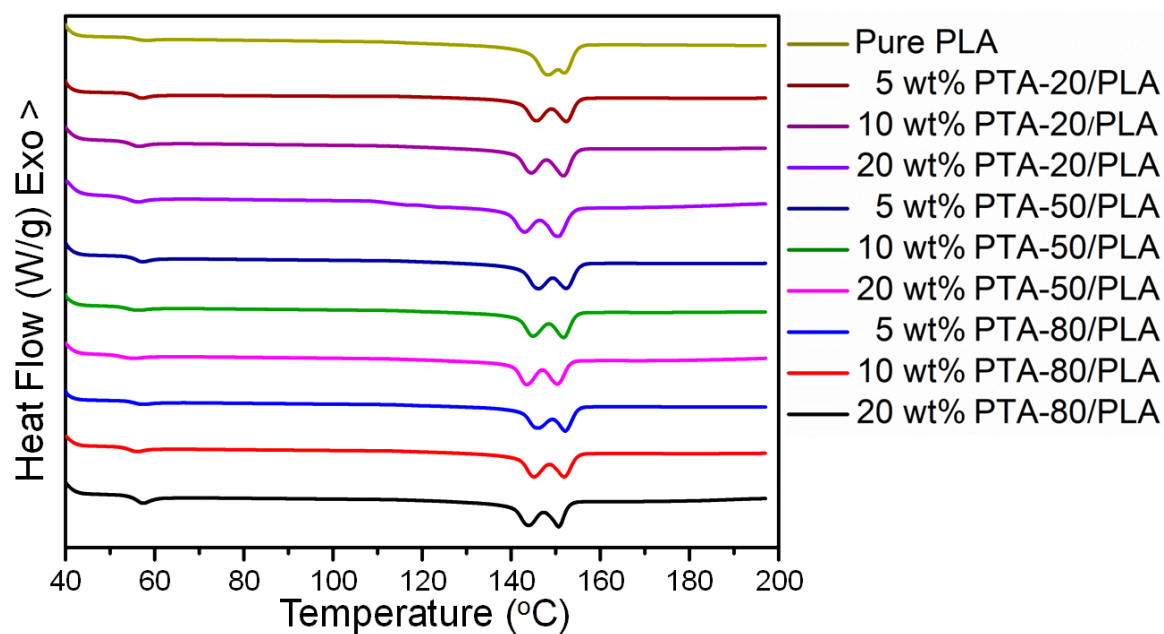

**Figure S3.** DSC thermograms of pure PLA and crystalline PTA/PLA composite thin films with a cooling down procedure of 110 °C for 2 h.

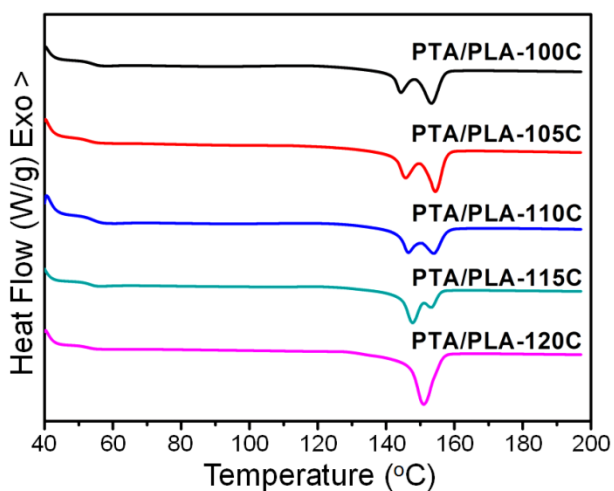

**Figure S4.** DSC thermograms of crystalline PTA-80/PLA composite thin films subjected to different crystallization temperatures for 2 h. The PTA content for those films was kept at 5 wt%.

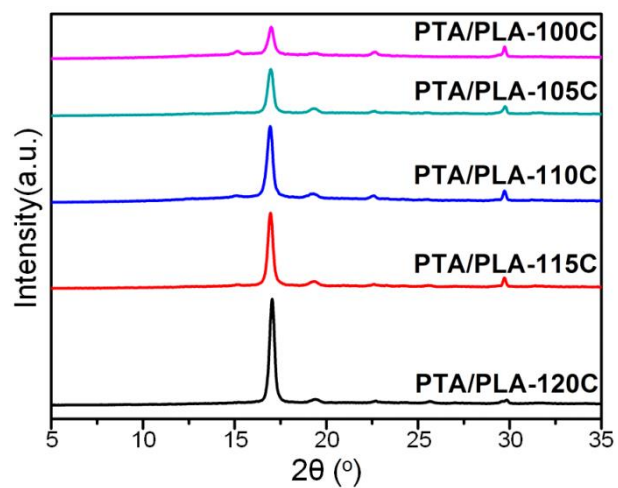

**Figure S5.** X-ray diffraction patterns of PTA/PLA-100C, PTA/PLA-105C, PTA/PLA-110C, PTA/PLA-115C and PTA/PLA-120C.

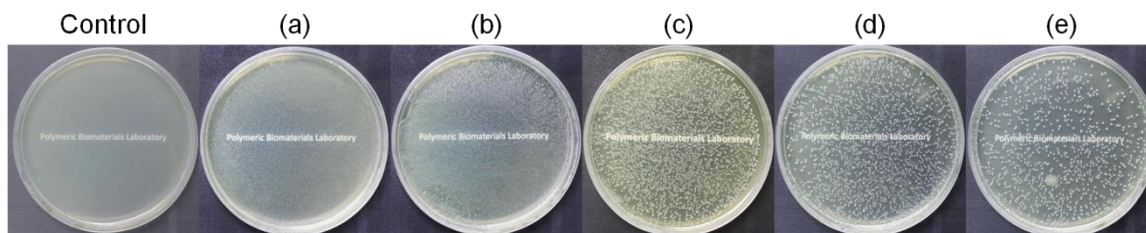

**Figure S6.** Agar plate results of a) PTA/PLA-120C, b) PTA/PLA-115C, c) PTA/PLA-110C, d) PTA/PLA-105C, e) PTA/PLA-100C.

## Supporting Tables

**Table S1.** Thermal properties of amorphous PTA-80/PLA composite thin films containing an increasing PTA-added content.

| Entry                      | T <sub>g</sub> (°C) | T <sub>m</sub> (°C) | T <sub>de</sub> (°C) |
|----------------------------|---------------------|---------------------|----------------------|
| Neat PLA films             | 55.58               | 151.48              | 335.56               |
| PTA-80/PLA (5 wt% PTA-80)  | 55.03               | 151.12              | 331.32               |
| PTA-80/PLA (10 wt% PTA-80) | 54.9                | 151.0               | 327.91               |
| PTA-80/PLA (20 wt% PTA-80) | 53.14               | 150.17              | 302.33               |

**Table S2.** Mechanical properties of crystalline PTA-80/PLA composite thin films containing an increasing PTA-added content.

| Entry <sup>a)</sup>        | Tensile strength<br>(MPa) | Young's modulus<br>(MPa) | Elongation at<br>break (%) |
|----------------------------|---------------------------|--------------------------|----------------------------|
| Neat PLA films             | 39.5 ± 1.7                | 29.7 ± 2.3               | 1.12 ± 0.12                |
| PTA-80/PLA (5 wt% PTA-80)  | 36.5 ± 2.8                | 27.6 ± 2.7               | 1.21 ± 0.22                |
| PTA-80/PLA (10 wt% PTA-80) | 35.4 ± 2.4                | 26.4 ± 2.3               | 1.28 ± 0.21                |
| PTA-80/PLA (20 wt% PTA-80) | 33.8 ± 3.1                | 24.8 ± 2.4               | 1.34 ± 0.11                |

<sup>a)</sup>All the listed mechanical properties were an average value plus its standard deviation from three independent measurements.
